# Supplementary material
Source: Research Square preprint supplement (doi:10.21203/rs.3.rs-10020586/v1)
Supplement: Supplementary file 1 [file edf3dd48631131e11874a290.docx]

**Supplementary Information**

**Development of a machine learning-based prediction model for objective indications for renal replacement therapy after stage 3 acute kidney injury**

Chao-Dong Chen et al.

Supplementary tables are supplied as separate CSV files to preserve readability and avoid distortion of wide tables. The catalogue below links each supplementary table number to its corresponding CSV file. Supplementary table numbering is independent of the main-text table numbering.

| **Supplementary table** | **Description** | **CSV file** | **Referenced in main text** |
| --- | --- | --- | --- |
| S1 | Detailed cohort flow and safety checks | S1_detailed_cohort_flow.csv | Yes |
| S2 | Full baseline characteristics by objective RRT-NEED status | S2_full_baseline_characteristics.csv | Yes |
| S3 | Objective RRT-NEED components and hierarchical component counts | S3_objective_RRT_NEED_components.csv | Yes |
| S4 | Candidate predictor missingness by cohort | S4_candidate_predictor_missingness.csv | No |
| S5 | Predictor filtering and retention decisions | S5_predictor_filtering_decisions.csv | No |
| S6 | Imputation stability diagnostics | S6_imputation_stability_pooled.csv | No |
| S7 | Imputation stability alerts | S7_imputation_stability_alerts.csv | No |
| S8 | Feature-selection stability across imputed datasets | S8_feature_selection_stability.csv | Yes |
| S9 | Calibration deciles for selected models | S9_calibration_deciles.csv | Yes |
| S10 | All-model pooled performance summary | S10_all_model_pooled_performance.csv | No |
| S11 | Hyperparameter tuning summary | S11_hyperparameter_tuning_summary.csv | No |
| S12 | TRIPOD+AI working checklist | S12_TRIPOD_AI_checklist.csv | No |
| S13 | PROBAST+AI self-assessment | S13_PROBAST_AI_assessment.csv | No |
| S14 | Overall baseline characteristics of the MIMIC-IV and eICU-CRD analytic cohorts. | S14_overall_baseline_MIMIC_vs_eICU.csv | Yes |

**Notes**

All supplementary tables are provided in comma-separated value format and can be opened in spreadsheet software. Raw patient-level data from MIMIC-IV and eICU are not redistributed by the authors and remain subject to the original PhysioNet data-use agreements.
